# Supplementary material
Source: HighWire-hosted journal article supplement (https://www.annfammed.org/highwire/filestream/7906/field_highwire_adjunct_files/0/Kruse_Suppl_Table_1.pdf)
Supplement: Kruse_Suppl_Table_1.pdf [file Kruse_Suppl_Table_1.pdf]

Online Supplementary Material

Kruse RL, Mehr DR, van der Steen JT, et al. Antibiotic treatment and survival of nursing home patients with lower respiratory infection: a cross-national analysis. *Ann Fam Med*. 2005;3:422.

<http://www.annfammed.org/cgi/content/full/3/5/422/DC1>

**Supplemental Table 1. Mortality at 1 and 3 Months by Nation, Initial Antibiotic Treatment, and Mortality Risk Predicted by Logistic Regression Models**

| Antibiotic Treatment                                                  | Predicted Probability of Mortality |                  |                  |                   |                   |              |
|-----------------------------------------------------------------------|------------------------------------|------------------|------------------|-------------------|-------------------|--------------|
|                                                                       | N Died/N (% Mortality)             |                  |                  |                   |                   |              |
|                                                                       | 0.0-0.049                          | 0.05-0.099       | 0.1-0.149        | 0.15-0.249        | 0.25-0.399        | ≥0.40        |
| <b>1-month mortality, US residents</b>                                |                                    |                  |                  |                   |                   |              |
| Oral amoxicillin                                                      | 0/19 (0.0)                         | 0/27 (0.0)       | 2/15 (13.3)      | 3/14 (21.4)       | 0/9 (0.0)         | 3/7 (42.9)   |
| Oral amoxicillin/clavulanate                                          | 1/12 (8.3)                         | 0/2 (0.0)        | 0/6 (0.0)        | 0/6 (0.0)         | 0/5 (0.0)         | 1/1 (100.0)  |
| Oral doxycycline, tetracycline, TMP-SMX, or macrolide                 | 3/62 (4.8)                         | 1/64 (1.6)       | 2/34 (5.9)       | 5/36 (13.9)       | 10/22 (45.4)      | 2/6 (33.3)   |
| Flouroquinolone with or without another agent                         | 0/14 (0.0)                         | 4/25 (16.0)      | 4/23 (17.4)      | 0/16 (0.0)        | 6/21 (28.6)       | 4/8 (50.0)   |
| First-generation or oral second-generation cephalosporin              | 0/22 (0.0)                         | 3/25 (12.0)      | 2/16 (12.5)      | 4/19 (21.0)       | 3/7 (42.9)        | 1/2 (50.0)   |
| Third-generation or parenteral second-generation cephalosporin        | 1/15 (6.7)                         | 6/30 (20.0)      | 2/23 (8.7)       | 7/34 (20.6)       | 6/31 (19.4)       | 6/14 (42.9)  |
| All other regimens                                                    | 0/10 (0.0)                         | 4/20 (20.0)      | 4/16 (25.0)      | 9/28 (32.1)       | 6/23 (26.1)       | 7/17 (41.2)  |
| Total United States                                                   | 5/154 (3.2)                        | 18/193 (9.3)     | 16/133 (12.0)    | 28/153 (18.3)     | 31/118 (26.3)     | 24/55 (43.6) |
|                                                                       |                                    | <b>0.0-0.099</b> | <b>0.1-0.149</b> | <b>0.15-0.249</b> | <b>0.25-0.399</b> | <b>≥0.40</b> |
| <b>1-month mortality, Dutch residents</b>                             |                                    |                  |                  |                   |                   |              |
| Oral amoxicillin*                                                     |                                    | 2/48 (4.2)       | 5/29 (17.2)      | 7/44 (15.9)       | 17/55 (30.9)      | 17/31 (54.8) |
| Oral amoxicillin/clavulanate                                          |                                    | 0/22 (0.0)       | 1/11 (9.1)       | 3/25 (12.0)       | 4/10 (40.0)       | 13/17 (76.5) |
| Oral doxycycline, tetracycline, TMP-SMX, or macrolide                 |                                    | 1/14 (7.1)       | 0/7 (0.0)        | 2/10 (20.0)       | 10/17 (58.8)      | 5/8 (62.5)   |
| Intramuscular ampicillin or amoxicillin, followed by oral amoxicillin |                                    | 0/3 (0.0)        | 0/3 (0.0)        | 1/3 (33.3)        | 6/13 (46.2)       | 12/24 (50.0) |
| All other regimens <sup>†</sup>                                       |                                    | 0/1 (0.0)        | 1/2 (50.0)       | 2/2 (100.0)       | 2/6 (33.3)        | 4/4 (100.0)  |
| Total Dutch                                                           |                                    | 3/88 (3.4)       | 7/52 (13.5)      | 15/84 (15.9)      | 39/101 (38.6)     | 51/84 (60.7) |

*Continued*

## Online Supplementary Data

<http://www.annfammed.org/cgi/content/full/3/5/422/DC1>

| Antibiotic Treatment                                                                                                                                                                                                                                                          | 0.0-0.049  | 0.05-0.099       | 0.1-0.149        | 0.15-0.249        | 0.25-0.399        | ≥0.40         |
|-------------------------------------------------------------------------------------------------------------------------------------------------------------------------------------------------------------------------------------------------------------------------------|------------|------------------|------------------|-------------------|-------------------|---------------|
| <b>3-month mortality, US residents</b>                                                                                                                                                                                                                                        |            |                  |                  |                   |                   |               |
| Oral amoxicillin                                                                                                                                                                                                                                                              | 0/4 (0.0)  | 1/15 (6.7)       | 2/14 (14.3)      | 3/28 (10.7)       | 4/16 (25.0)       | 6/14 (42.9)   |
| Oral amoxicillin/clavulanate                                                                                                                                                                                                                                                  | 1/2 (50.0) | 1/7 (14.3)       | 0/3 (0.0)        | 1/7 (14.3)        | 1/12 (8.3)        | 1/1 (100.0)   |
| Oral doxycycline, tetracycline, TMP-SMX, or macrolide                                                                                                                                                                                                                         | 0/7 (0.0)  | 1/46 (2.2)       | 6/42 (14.3)      | 8/52 (15.4)       | 9/53 (17.0)       | 17/24 (70.8)  |
| Fluoroquinolone with or without another agent                                                                                                                                                                                                                                 | 0/6 (0.0)  | 0/11 (0.0)       | 4/17 (23.5)      | 7/24 (29.2)       | 7/35 (20.0)       | 7/14 (50.0)   |
| First-generation or oral second-generation cephalosporin                                                                                                                                                                                                                      | 0/9 (0.0)  | 0/10 (0.0)       | 1/11 (9.1)       | 7/29 (24.1)       | 5/21 (23.8)       | 7/11 (63.6)   |
| Third-generation or parenteral second-generation cephalosporin                                                                                                                                                                                                                | 0/4 (0.0)  | 2/12 (16.7)      | 2/16 (12.5)      | 9/29 (31.0)       | 16/44 (36.4)      | 19/42 (45.2)  |
| All other regimens                                                                                                                                                                                                                                                            | 0/0        | 1/9 (11.1)       | 4/13 (30.8)      | 4/20 (20.0)       | 19/39 (48.7)      | 17/33 (51.5)  |
| Total United States                                                                                                                                                                                                                                                           | 1/32 (3.1) | 6/110 (5.4)      | 19/116 (16.4)    | 39/189 (20.6)     | 61/220 (27.7)     | 74/139 (53.2) |
|                                                                                                                                                                                                                                                                               |            | <b>0.0-0.099</b> | <b>0.1-0.149</b> | <b>0.15-0.249</b> | <b>0.25-0.399</b> | <b>≥0.40</b>  |
| <b>3-month mortality, Dutch residents</b>                                                                                                                                                                                                                                     |            |                  |                  |                   |                   |               |
| Oral amoxicillin*                                                                                                                                                                                                                                                             |            | 1/11 (9.1)       | 2/25 (8.0)       | 8/41 (19.5)       | 20/60 (33.3)      | 31/68 (45.6)  |
| Oral amoxicillin/clavulanate                                                                                                                                                                                                                                                  |            | 0/5 (0.0)        | 1/10 (10.0)      | 4/22 (18.2)       | 6/20 (30.0)       | 17/24 (70.8)  |
| Oral doxycycline, tetracycline, TMP-SMX, or macrolide                                                                                                                                                                                                                         |            | 1/4 (25.0)       | 2/10 (20.0)      | 2/5 (40.0)        | 6/16 (37.5)       | 14/21 (66.7)  |
| Intramuscular ampicillin or amoxicillin, followed by oral amoxicillin                                                                                                                                                                                                         |            | 0/1 (0.0)        | 0/2 (0.0)        | 0/3 (0.0)         | 3/7 (42.9)        | 18/33 (54.6)  |
| All other regimens†                                                                                                                                                                                                                                                           |            | 0/1 (0.0)        | 0.0              | 2/2 (100.0)       | 5/5 (100.0)       | 4/7 (57.1)    |
| Total Dutch                                                                                                                                                                                                                                                                   |            | 2/22 (9.1)       | 5/47 (10.6)      | 16/73 (21.9)      | 40/108 (37.0)     | 84/153 (54.9) |
| TMP-SMX = trimethoprim-sulfamethoxazole.<br>* Includes 2 Dutch residents who received oral penicillin.<br>† Includes fluoroquinolones and cephalosporins as listed for the US residents. The categories were combined because so few Dutch residents received these regimens. |            |                  |                  |                   |                   |               |
